# Supplementary material for: Biotechnological Key Genes of the Rhodococcus erythropolis MGMM8 Genome: Genes for Bioremediation, Antibiotics, Plant Protection, and Growth Stimulation
Source: MDPI journal article supplement (doi:10.3390/microorganisms12010088), 2023-12-31
Supplement: s1 [file s1]

# **Biotechnological key genes of *Rhodococcus erythropolis* MGMM8 genome: Genes for bioremediation, antibiotics, plant protection, and growth stimulation**

**Daniel Mawuena Afordoanyi<sup>1,2\*</sup>, Yaw Abayie Akosah<sup>3\*</sup>, Lidiya Shnakhova<sup>4</sup>, Keremli Saparmyradov<sup>1</sup> Elena Shulga<sup>1</sup>, Roderic Gilles Claret Diabankana<sup>1</sup> and Shamil Validov<sup>1</sup>**

<sup>1</sup> Laboratory of Molecular Genetics and Microbiology Methods, Kazan Scientific Center of Russian Academy of Sciences, 420111 Kazan, Russia.

<sup>2</sup> Tatar Scientific Research Institute of Agricultural Chemistry and Soil Science, FRC Kazan Scientific Center, Russian Academy of Sciences, 420111 Kazan, Russia.

<sup>3</sup> Department of Molecular Pathobiology, New York University College of Dentistry, New York, NY 10010, USA.

<sup>4</sup> Dermatology Department, I.M. Sechenov First Moscow State Medical University (Sechenov University), Moscow, Russia.

\* Correspondence: [d.afordoanyi@knc.ru](mailto:d.afordoanyi@knc.ru); [r.diabankana@knc.ru](mailto:r.diabankana@knc.ru)

## A. MGMM8

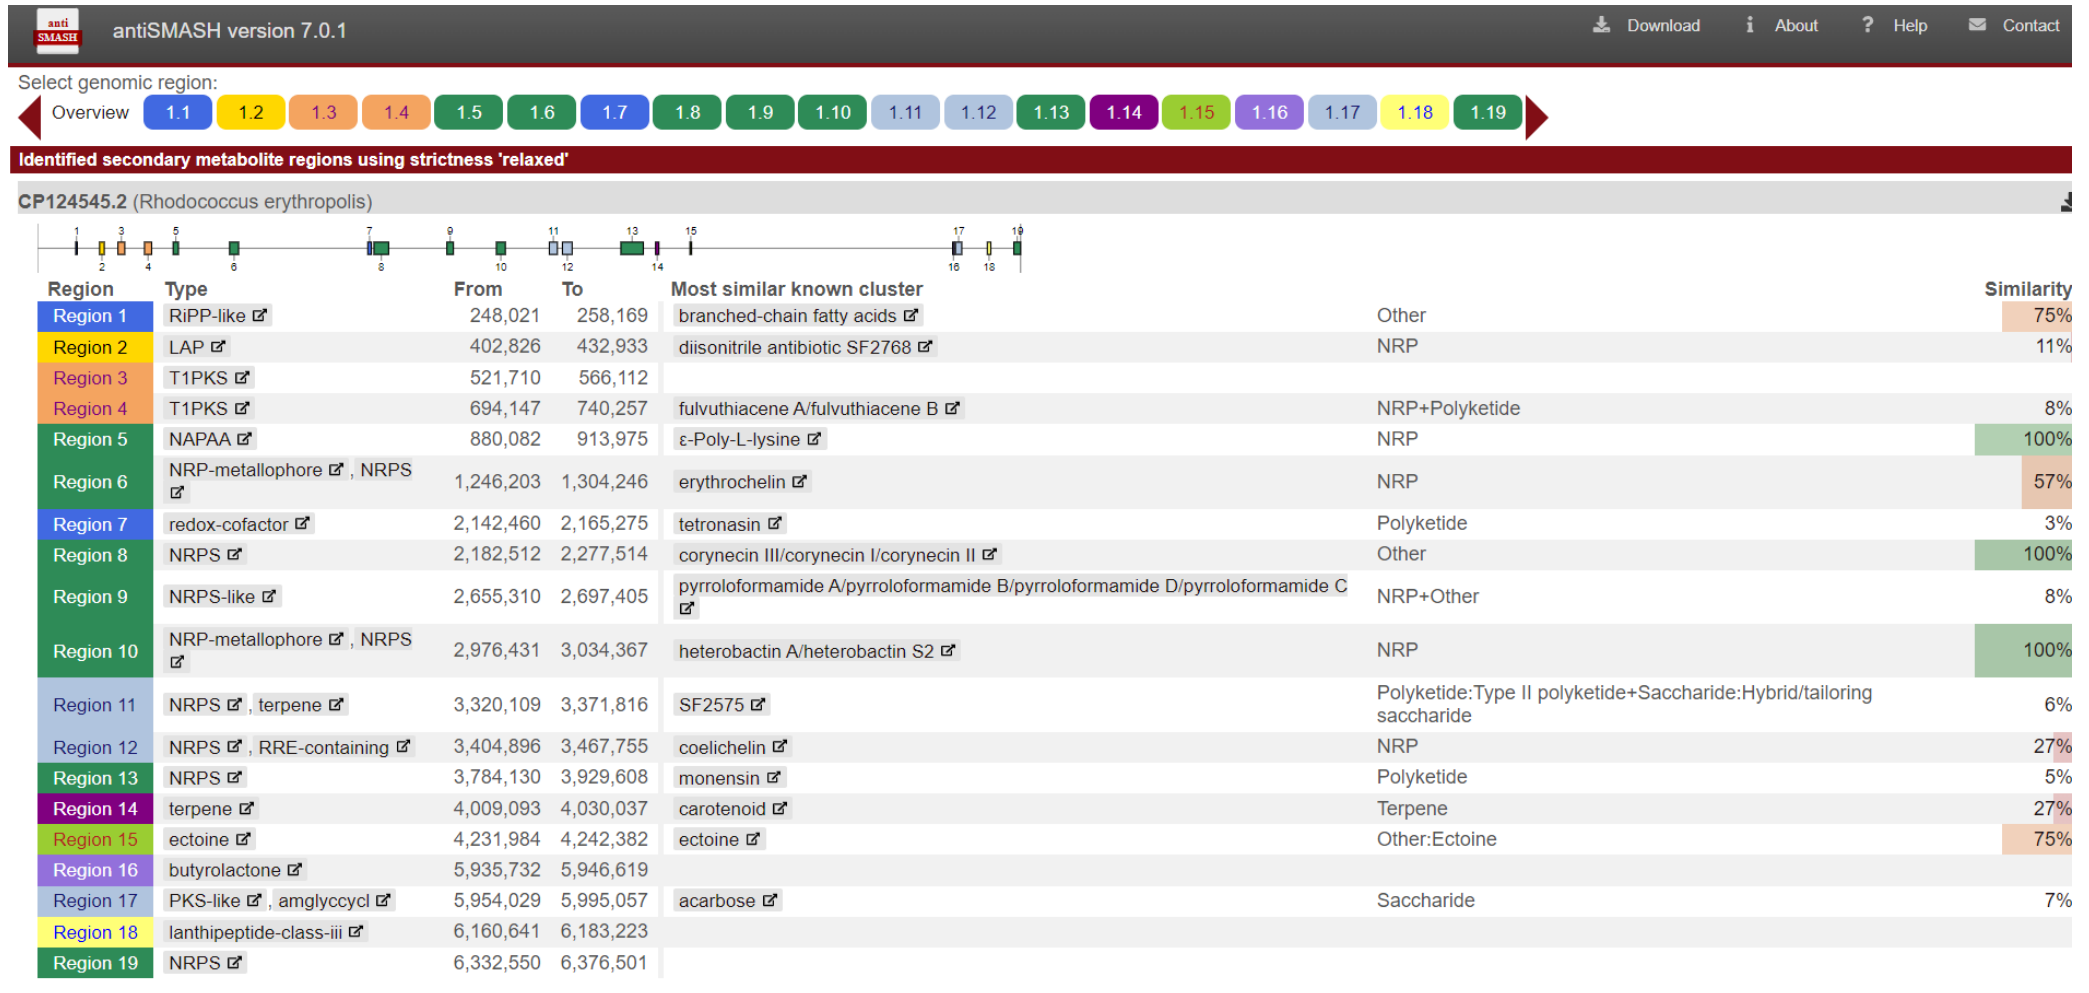

## B. JCM2895


antiSMASH version 7.0.1

 Download
  About
  Help
  Contact

Select genomic region:

Overview
 1.1
 1.2
 1.3
 1.4
 1.5
 1.6
 1.7
 1.8
 1.9
 1.10
 1.11
 1.12
 1.13
 1.14
 1.15
 1.16
 1.17
 1.18
 1.19

Identified secondary metabolite regions using strictness 'relaxed'

NZ\_AP018733.1 (Rhodococcus erythropolis)

| Region    | Type                    | From      | To        | Most similar known cluster                                                           |                                                                      | Similarity |
|-----------|-------------------------|-----------|-----------|--------------------------------------------------------------------------------------|----------------------------------------------------------------------|------------|
| Region 1  | LAP                     | 125,965   | 156,061   | diisonitrile antibiotic SF2768                                                       | NRP                                                                  | 11%        |
| Region 2  | T1PKS                   | 245,004   | 289,409   |                                                                                      |                                                                      |            |
| Region 3  | T1PKS                   | 410,926   | 457,036   | fulvuthiacene A/fulvuthiacene B                                                      | NRP+Polyketide                                                       | 8%         |
| Region 4  | NAPAA                   | 595,757   | 629,650   | $\epsilon$ -Poly-L-lysine                                                            | NRP                                                                  | 100%       |
| Region 5  | NRP-metallophore, NRPS  | 969,491   | 1,027,543 | erythrochelin                                                                        | NRP                                                                  | 57%        |
| Region 6  | redox-cofactor          | 1,857,852 | 1,880,667 | tetronasin                                                                           | Polyketide                                                           | 3%         |
| Region 7  | NRPS                    | 1,899,383 | 2,010,321 | corynecine III/corynecine I/corynecine II                                            | Other                                                                | 100%       |
| Region 8  | NRPS-like               | 2,399,895 | 2,442,147 | pyrroloformamide A/pyrroloformamide B/pyrroloformamide D/pyrroloformamide C          | NRP+Other                                                            | 8%         |
| Region 9  | NRP-metallophore, NRPS  | 2,750,896 | 2,808,836 | heterobactin B/heterobactin S2                                                       | NRP                                                                  | 100%       |
| Region 10 | NRPS, terpene           | 3,097,081 | 3,150,209 | SF2575                                                                               | Polyketide:Type II polyketide+Saccharide:Hybrid/tailoring saccharide | 6%         |
| Region 11 | NRPS, RRE-containing    | 3,183,440 | 3,246,339 | coelichelin                                                                          | NRP                                                                  | 27%        |
| Region 12 | NRPS                    | 3,482,803 | 3,548,199 | rifamorpholine A/rifamorpholine B/rifamorpholine C/rifamorpholine D/rifamorpholine E | Polyketide                                                           | 3%         |
| Region 13 | NRPS                    | 3,551,927 | 3,606,582 | monensin                                                                             | Polyketide                                                           | 5%         |
| Region 14 | terpene                 | 3,686,525 | 3,707,469 | carotenoid                                                                           | Terpene                                                              | 27%        |
| Region 15 | ectoine                 | 3,910,168 | 3,920,566 | ectoine                                                                              | Other:Ectoine                                                        | 75%        |
| Region 16 | butyrolactone           | 5,621,464 | 5,632,351 |                                                                                      |                                                                      |            |
| Region 17 | lanthipeptide-class-iii | 5,880,331 | 5,902,913 |                                                                                      |                                                                      |            |
| Region 18 | NRPS                    | 6,262,069 | 6,306,475 | polyoxin A/polyoxin H                                                                | Other                                                                | 5%         |
| Region 19 | RiPP-like               | 6,391,794 | 6,403,724 | branched-chain fatty acids                                                           | Other                                                                | 75%        |

## C. X5

 antiSMASH version 7.0.1
 

 Download
  About
  Help
  Contact

Select genomic region:

Overview
 

1.1
 1.2
 1.3
 1.4
 1.5
 1.6
 1.7
 1.8
 1.9
 1.10
 1.11
 1.12
 1.13
 1.14
 1.15
 1.16
 1.17
 1.18

Identified secondary metabolite regions using strictness 'relaxed'

NZ\_CP044284.1 (Rhodococcus erythropolis)

| Region    | Type                    | From      | To        | Most similar known cluster                                                           |                                                                      | Similarity |
|-----------|-------------------------|-----------|-----------|--------------------------------------------------------------------------------------|----------------------------------------------------------------------|------------|
| Region 1  | LAP                     | 116,838   | 146,934   | diisonitrile antibiotic SF2768                                                       | NRP                                                                  | 11%        |
| Region 2  | T1PKS                   | 236,157   | 280,586   |                                                                                      |                                                                      |            |
| Region 3  | T1PKS                   | 420,459   | 466,569   | fulvuthiacene A/fulvuthiacene B                                                      | NRP+Polyketide                                                       | 8%         |
| Region 4  | NAPAA                   | 606,766   | 640,659   | ε-Poly-L-lysine                                                                      | NRP                                                                  | 100%       |
| Region 5  | NRP-metallophore, NRPS  | 980,500   | 1,038,534 | erythrochelin                                                                        | NRP                                                                  | 57%        |
| Region 6  | redox-cofactor          | 1,838,993 | 1,861,808 | tetronasin                                                                           | Polyketide                                                           | 3%         |
| Region 7  | NRPS                    | 1,880,524 | 1,988,279 | corynecin III/corynecin I/corynecin II                                               | Other                                                                | 100%       |
| Region 8  | NRPS-like               | 2,450,634 | 2,492,427 |                                                                                      |                                                                      |            |
| Region 9  | NRP-metallophore, NRPS  | 2,858,916 | 2,916,856 | heterobactin B/heterobactin S2                                                       | NRP                                                                  | 100%       |
| Region 10 | NRPS, terpene           | 3,205,049 | 3,258,029 | SF2575                                                                               | Polyketide:Type II polyketide+Saccharide:Hybrid/tailoring saccharide | 6%         |
| Region 11 | NRPS, RRE-containing    | 3,291,256 | 3,354,129 | coelichelin                                                                          | NRP                                                                  | 27%        |
| Region 12 | NRPS                    | 3,590,593 | 3,655,989 | rifamorpholine A/rifamorpholine B/rifamorpholine C/rifamorpholine D/rifamorpholine E | Polyketide                                                           | 3%         |
| Region 13 | NRPS                    | 3,658,911 | 3,715,122 | monensin                                                                             | Polyketide                                                           | 5%         |
| Region 14 | terpene                 | 3,794,315 | 3,815,259 | carotenoid                                                                           | Terpene                                                              | 27%        |
| Region 15 | ectoine                 | 4,017,958 | 4,028,356 | ectoine                                                                              | Other:Ectoine                                                        | 75%        |
| Region 16 | butyrolactone           | 5,766,086 | 5,776,973 |                                                                                      |                                                                      |            |
| Region 17 | lanthipeptide-class-iii | 6,006,250 | 6,028,832 |                                                                                      |                                                                      |            |
| Region 18 | RIPP-like               | 6,415,275 | 6,427,205 | branched-chain fatty acids                                                           | Other                                                                | 75%        |

## D. D310-1


 antiSMASH version 7.0.1
 

 Download
  About
  Help
  Contact

Select genomic region:

Overview
1.1
1.2
1.3
1.4
1.5
1.6
1.7
1.8
1.9
1.10
1.11
1.12
1.13
1.14
1.15
1.16
1.17
1.18

Identified secondary metabolite regions using strictness 'relaxed'

NZ\_CP032403.1 (Rhodococcus erythropolis)

| Region    | Type                    | From      | To        | Most similar known cluster                                                           |                                                                      | Similarity |
|-----------|-------------------------|-----------|-----------|--------------------------------------------------------------------------------------|----------------------------------------------------------------------|------------|
| Region 1  | LAP                     | 102,825   | 132,918   | diisonitrile antibiotic SF2768                                                       | NRP                                                                  | 11%        |
| Region 2  | T1PKS                   | 223,958   | 268,377   |                                                                                      |                                                                      |            |
| Region 3  | T1PKS                   | 415,858   | 461,959   | fulvuthiacene A/fulvuthiacene B                                                      | NRP+Polyketide                                                       | 8%         |
| Region 4  | NAPAA                   | 605,284   | 639,177   | ε-Poly-L-lysine                                                                      | NRP                                                                  | 100%       |
| Region 5  | NRP-metallophore, NRPS  | 988,683   | 1,046,654 | erythrochelin                                                                        | NRP                                                                  | 57%        |
| Region 6  | redox-cofactor          | 1,864,380 | 1,887,195 | tetronasin                                                                           | Polyketide                                                           | 3%         |
| Region 7  | NRPS                    | 1,904,978 | 2,009,465 | corynecin III/corynecin I/corynecin II                                               | Other                                                                | 100%       |
| Region 8  | NRPS-like               | 2,433,838 | 2,475,882 |                                                                                      |                                                                      |            |
| Region 9  | NRP-metallophore, NRPS  | 2,773,975 | 2,831,891 | heterobactin A/heterobactin S2                                                       | NRP                                                                  | 100%       |
| Region 10 | NRPS, terpene           | 3,122,623 | 3,176,030 | SF2575                                                                               | Polyketide:Type II polyketide+Saccharide:Hybrid/tailoring saccharide | 6%         |
| Region 11 | NRPS, RRE-containing    | 3,208,672 | 3,273,198 | coelichelin                                                                          | NRP                                                                  | 27%        |
| Region 12 | NRPS                    | 3,515,691 | 3,684,637 | rifamorpholine A/rifamorpholine B/rifamorpholine C/rifamorpholine D/rifamorpholine E | Polyketide                                                           | 4%         |
| Region 13 | terpene                 | 3,763,591 | 3,784,535 | carotenoid                                                                           | Terpene                                                              | 27%        |
| Region 14 | ectoine                 | 3,996,913 | 4,007,311 | ectoine                                                                              | Other:Ectoine                                                        | 75%        |
| Region 15 | butyrolactone           | 5,745,795 | 5,756,682 |                                                                                      |                                                                      |            |
| Region 16 | PKS-like, amglyccycl    | 5,781,938 | 5,822,966 | acarbose                                                                             | Saccharide                                                           | 7%         |
| Region 17 | lanthipeptide-class-iii | 5,996,350 | 6,018,932 |                                                                                      |                                                                      |            |
| Region 18 | RiPP-like               | 6,457,414 | 6,469,344 | branched-chain fatty acids                                                           | Other                                                                | 75%        |

## E. CCM2595

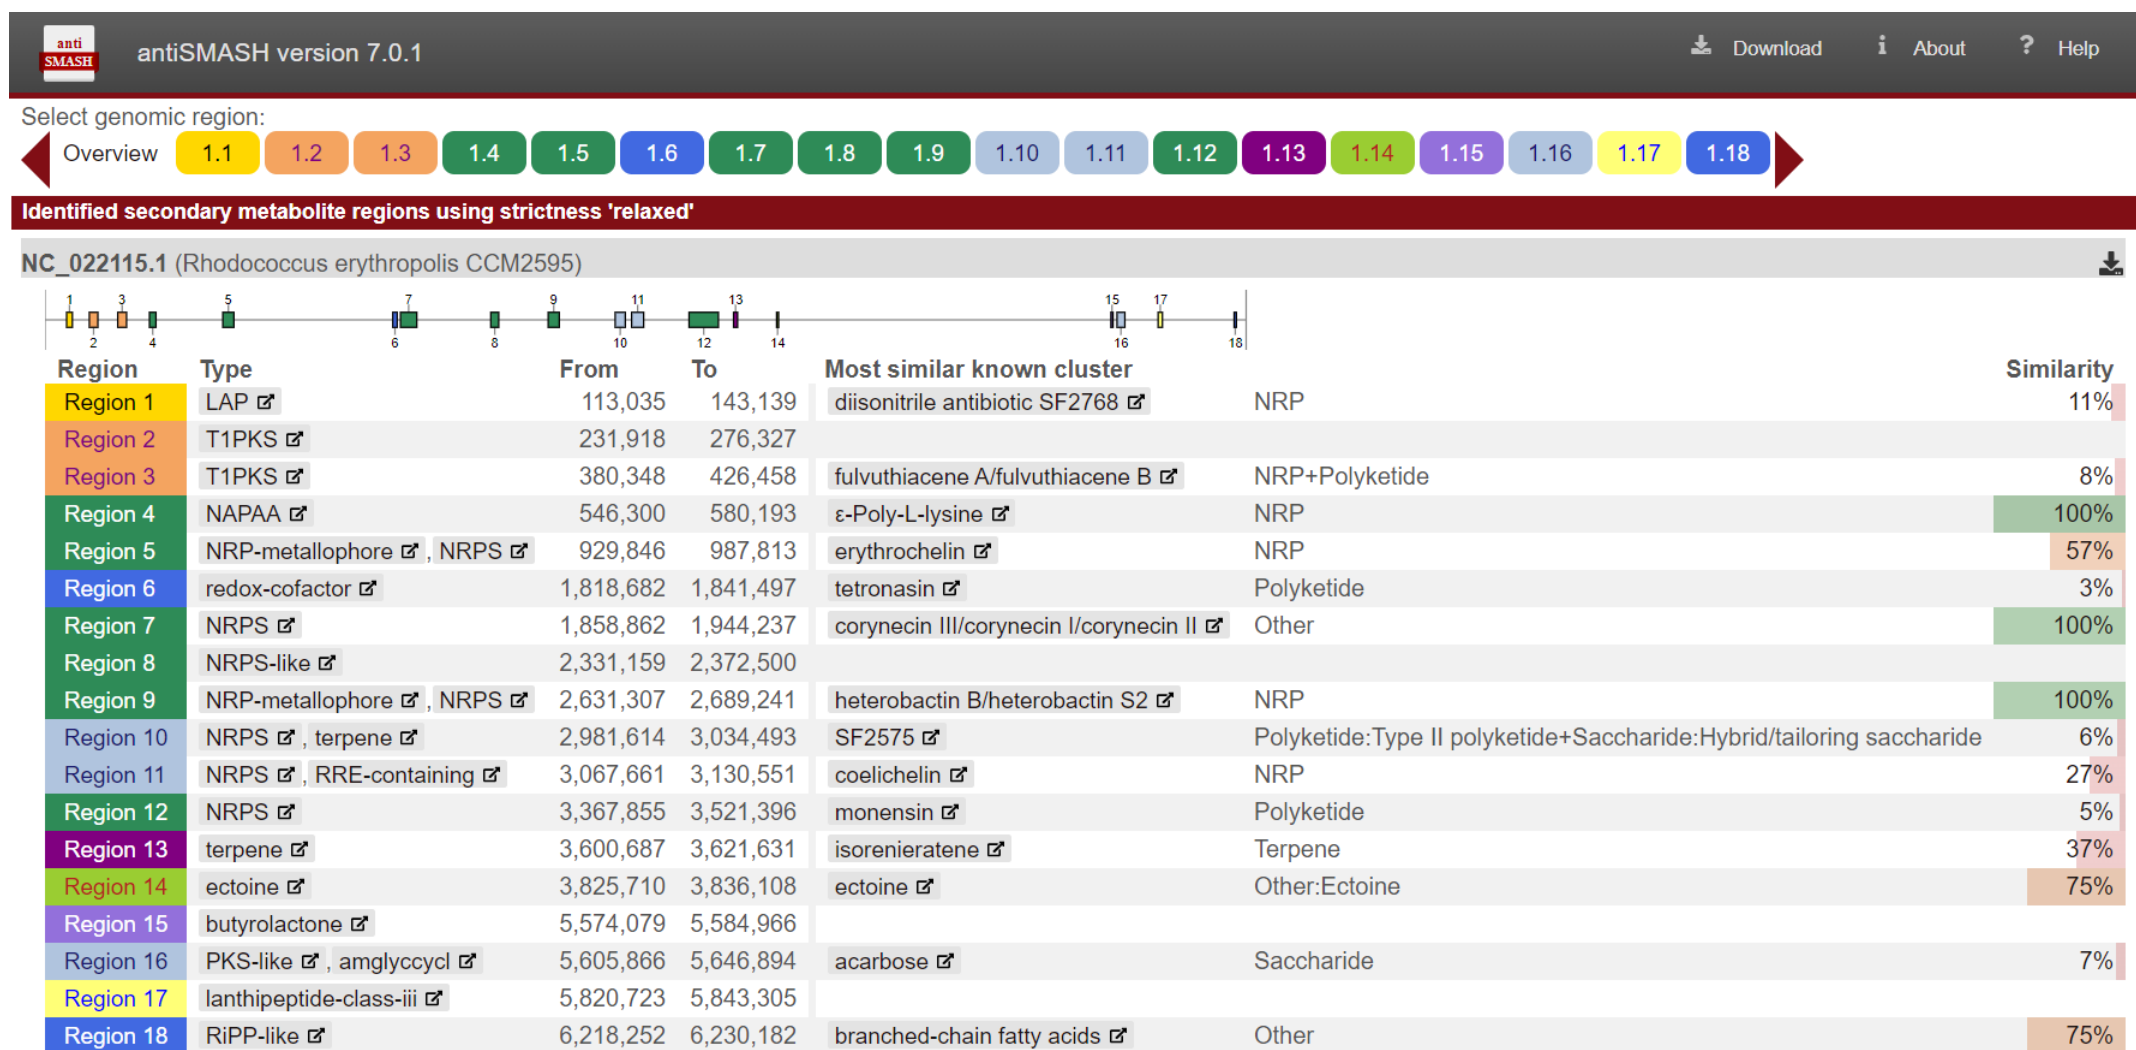

**Figure S1.** AntiSMASH results for the prediction of secondary metabolites cluster genes of *R. erythropolis* MGMM8 (A), JCM2895 (B), X5(C), D310-1(D), and CCM2595 (E) core genomes.

CARD: RGI Results

← Back to RGI

Download Results

CP124545.2.fasta

Table View

AMR Genes

AMR Gene Family

Drug Class

Resistance Mechanism

Summary (summary counts and figures only include Loose hits of e-10 or better)

| Filename   | Date (UTC)                  | RGI Criteria                         | # Perfect Hits | # Strict Hits | # Loose Hits | Download                 |
|------------|-----------------------------|--------------------------------------|----------------|---------------|--------------|--------------------------|
| CP124545.2 | September 04, 2023 14:34:59 | Perfect, Strict, complete genes only | 0              | 4             | 0            | <a href="#">Download</a> |

Results (all Loose hits shown)

Search:

| RGI Criteria | ARO Term                                                                                        | SNP  | Detection Criteria    | AMR Gene Family                                  | Drug Class                | Resistance Mechanism         | % Identity of Matching Region | % Length of Reference Sequence |
|--------------|-------------------------------------------------------------------------------------------------|------|-----------------------|--------------------------------------------------|---------------------------|------------------------------|-------------------------------|--------------------------------|
| Strict       | vanW gene in vanI cluster                                                                       |      | protein homolog model | vanW, glycopeptide resistance gene cluster       | glycopeptide antibiotic   | antibiotic target alteration | 29.74                         | 205.36                         |
| Strict       | vanY gene in vanB cluster                                                                       |      | protein homolog model | vanY, glycopeptide resistance gene cluster       | glycopeptide antibiotic   | antibiotic target alteration | 29.92                         | 72.39                          |
| Strict       | lri                                                                                             |      | protein homolog model | rifampin monooxygenase                           | rifamycin antibiotic      | antibiotic inactivation      | 95.56                         | 99.16                          |
| Strict       | RbpA                                                                                            |      | protein homolog model | RbpA bacterial RNA polymerase-binding protein    | rifamycin antibiotic      | antibiotic target protection | 85.59                         | 98.25                          |
| Strict       | Mycobacterium tuberculosis folC with mutation conferring resistance to para-aminosalicylic acid | L56V | protein variant model | aminosalicylate resistant dihydrofolate synthase | salicylic acid antibiotic | antibiotic target alteration | 67.77                         | 98.36                          |

CARD: RGI Results

← Back to RGI

NZ\_AP018733.1.fasta

CP124545.2.fasta

Table View

AMR Genes

AMR Gene Family

Drug Class

Resistance Mechanism

Download Results

| Summary (summary counts and figures only include Loose hits of e-10 or better) |                             |                                      |                |               |              |                     |
|--------------------------------------------------------------------------------|-----------------------------|--------------------------------------|----------------|---------------|--------------|---------------------|
| Filename                                                                       | Date (UTC)                  | RGI Criteria                         | # Perfect Hits | # Strict Hits | # Loose Hits | Download            |
| NZ_AP018733.1                                                                  | September 04, 2023 14:35:41 | Perfect, Strict, complete genes only | 0              | 4             | 0            | <div>Download</div> |

| Results (all Loose hits shown) |                                                                                                 |      |                       |                                                  |                           |                              |                               |                                |
|--------------------------------|-------------------------------------------------------------------------------------------------|------|-----------------------|--------------------------------------------------|---------------------------|------------------------------|-------------------------------|--------------------------------|
| Search: <input type="text"/>   |                                                                                                 |      |                       |                                                  |                           |                              |                               |                                |
| RGI Criteria                   | ARO Term                                                                                        | SNP  | Detection Criteria    | AMR Gene Family                                  | Drug Class                | Resistance Mechanism         | % Identity of Matching Region | % Length of Reference Sequence |
| Strict                         | vanW gene in vanI cluster                                                                       |      | protein homolog model | vanW, glycopeptide resistance gene cluster       | glycopeptide antibiotic   | antibiotic target alteration | 29.74                         | 203.75                         |
| Strict                         | Streptomyces venezuelae rox                                                                     |      | protein homolog model | rifampin monooxygenase                           | rifamycin antibiotic      | antibiotic inactivation      | 66.18                         | 100.42                         |
| Strict                         | RbpA                                                                                            |      | protein homolog model | RbpA bacterial RNA polymerase-binding protein    | rifamycin antibiotic      | antibiotic target protection | 86.49                         | 98.25                          |
| Strict                         | Mycobacterium tuberculosis folC with mutation conferring resistance to para-aminosalicylic acid | L56V | protein variant model | aminosalicylate resistant dihydrofolate synthase | salicylic acid antibiotic | antibiotic target alteration | 67.77                         | 98.36                          |



CARD: RGI Results

← Back to RGI

Download Results

NZ\_CP044284.1.fasta  
NZ\_AP018733.1.fasta  
CP124545.2.fasta

Table View   AMR Genes   AMR Gene Family   Drug Class   Resistance Mechanism

Summary (summary counts and figures only include Loose hits of e-10 or better)

| Filename      | Date (UTC)                  | RGI Criteria                         | # Perfect Hits | # Strict Hits | # Loose Hits | Download                 |
|---------------|-----------------------------|--------------------------------------|----------------|---------------|--------------|--------------------------|
| NZ_CP044284.1 | September 04, 2023 14:36:34 | Perfect, Strict, complete genes only | 0              | 4             | 0            | <a href="#">Download</a> |

Results (all Loose hits shown)

| Search: <input type="text"/> |                                                                                                 |      |                       |                                                  |                           |                              |                               |                                |
|------------------------------|-------------------------------------------------------------------------------------------------|------|-----------------------|--------------------------------------------------|---------------------------|------------------------------|-------------------------------|--------------------------------|
| RGI Criteria                 | ARO Term                                                                                        | SNP  | Detection Criteria    | AMR Gene Family                                  | Drug Class                | Resistance Mechanism         | % Identity of Matching Region | % Length of Reference Sequence |
| Strict                       | vanW gene in vanI cluster                                                                       |      | protein homolog model | vanW, glycopeptide resistance gene cluster       | glycopeptide antibiotic   | antibiotic target alteration | 29.74                         | 203.75                         |
| Strict                       | Streptomyces venezuelae rox                                                                     |      | protein homolog model | rifampin monooxygenase                           | rifamycin antibiotic      | antibiotic inactivation      | 66.18                         | 100.42                         |
| Strict                       | RbpA                                                                                            |      | protein homolog model | RbpA bacterial RNA polymerase-binding protein    | rifamycin antibiotic      | antibiotic target protection | 86.49                         | 98.25                          |
| Strict                       | Mycobacterium tuberculosis folC with mutation conferring resistance to para-aminosalicylic acid | L56V | protein variant model | aminosalicylate resistant dihydrofolate synthase | salicylic acid antibiotic | antibiotic target alteration | 67.77                         | 98.36                          |

D. D310-1

CARD: RGI Results

← Back to RGI

NZ\_CP032403.1.fasta

NZ\_CP044284.1.fasta

NZ\_AP018733.1.fasta

CP124545.2.fasta

Table View

AMR Genes

AMR Gene Family

Drug Class

Resistance Mechanism

Download Results

Summary (summary counts and figures only include Loose hits of e-10 or better)

| Filename      | Date (UTC)                  | RGI Criteria                         | # Perfect Hits | # Strict Hits | # Loose Hits | Download            |
|---------------|-----------------------------|--------------------------------------|----------------|---------------|--------------|---------------------|
| NZ_CP032403.1 | September 04, 2023 14:37:40 | Perfect, Strict, complete genes only | 0              | 4             | 0            | <div>Download</div> |

Results (all Loose hits shown)

Search:

| RGI Criteria | ARO Term                                                                                        | SNP  | Detection Criteria    | AMR Gene Family                                  | Drug Class                | Resistance Mechanism         | % Identity of Matching Region | % Length of Reference Sequence |
|--------------|-------------------------------------------------------------------------------------------------|------|-----------------------|--------------------------------------------------|---------------------------|------------------------------|-------------------------------|--------------------------------|
| Strict       | vanW gene in vanI cluster                                                                       |      | protein homolog model | vanW, glycopeptide resistance gene cluster       | glycopeptide antibiotic   | antibiotic target alteration | 30.17                         | 200.54                         |
| Strict       | Streptomyces venezuelae rox                                                                     |      | protein homolog model | rifampin monooxygenase                           | rifamycin antibiotic      | antibiotic inactivation      | 67.09                         | 104.20                         |
| Strict       | RbpA                                                                                            |      | protein homolog model | RbpA bacterial RNA polymerase-binding protein    | rifamycin antibiotic      | antibiotic target protection | 86.49                         | 98.25                          |
| Strict       | Mycobacterium tuberculosis folC with mutation conferring resistance to para-aminosalicylic acid | L56V | protein variant model | aminosalicylate resistant dihydrofolate synthase | salicylic acid antibiotic | antibiotic target alteration | 67.56                         | 98.36                          |

E. CCM2595

## CARD: RGI Results

← Back to RGI

Download Results

NC\_022115.1.fasta

CP124545.2.fasta

Table View

AMR Genes

AMR Gene Family

Drug Class

Resistance Mechanism

Summary (summary counts and figures only include Loose hits of e-10 or better)

| Filename    | Date (UTC)                  | RGI Criteria                         | # Perfect Hits | # Strict Hits | # Loose Hits | Download                 |
|-------------|-----------------------------|--------------------------------------|----------------|---------------|--------------|--------------------------|
| NC_022115.1 | September 04, 2023 14:39:16 | Perfect, Strict, complete genes only | 0              | 4             | 0            | <a href="#">Download</a> |

Results (all Loose hits shown)

| Search: <input type="text"/> |                                                                                                 |      |                       |                                                  |                           |                              |                               |                                |
|------------------------------|-------------------------------------------------------------------------------------------------|------|-----------------------|--------------------------------------------------|---------------------------|------------------------------|-------------------------------|--------------------------------|
| RGI Criteria                 | ARO Term                                                                                        | SNP  | Detection Criteria    | AMR Gene Family                                  | Drug Class                | Resistance Mechanism         | % Identity of Matching Region | % Length of Reference Sequence |
| Strict                       | vanW gene in vanI cluster                                                                       |      | protein homolog model | vanW, glycopeptide resistance gene cluster       | glycopeptide antibiotic   | antibiotic target alteration | 29.74                         | 203.75                         |
| Strict                       | vanY gene in vanB cluster                                                                       |      | protein homolog model | vanY, glycopeptide resistance gene cluster       | glycopeptide antibiotic   | antibiotic target alteration | 29.92                         | 72.39                          |
| Strict                       | iri                                                                                             |      | protein homolog model | rifampin monooxygenase                           | rifamycin antibiotic      | antibiotic inactivation      | 96.19                         | 99.16                          |
| Strict                       | RbpA                                                                                            |      | protein homolog model | RbpA bacterial RNA polymerase-binding protein    | rifamycin antibiotic      | antibiotic target protection | 85.59                         | 98.25                          |
| Strict                       | Mycobacterium tuberculosis folC with mutation conferring resistance to para-aminosalicylic acid | L56V | protein variant model | aminosalicylate resistant dihydrofolate synthase | salicylic acid antibiotic | antibiotic target alteration | 67.77                         | 98.36                          |

**Figure S2.** Antibiotic resistance genes harbored in the core genomes of *R. erythropolis* MGMM8 (A), JCM2895 (B), X5 (C), D310-1 (D), CCM2595 (E).

[Gene overview](#)
[MIBiG comparison](#)
[ClusterBlast](#)
[KnownClusterBlast](#)
[SubClusterBlast](#)
[TFBS Finder](#)
[Pfam domains](#)
[TIGRFAM domains](#)

### Similar known gene clusters from MIBiG 3.1

All hits ▾

[Download graphic](#)

Query sequence

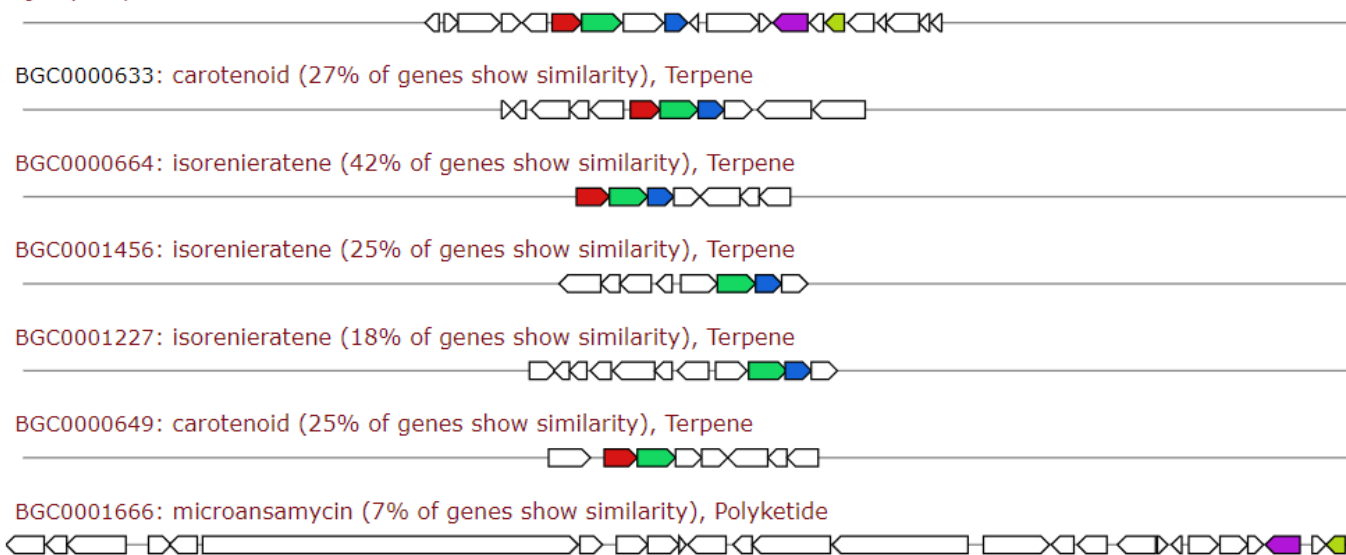

**Figure S3.** Percentage identity on the extra features of the KnownClusterBlast feature for Terpene type carotenoid on antiSMAH 7.0.1

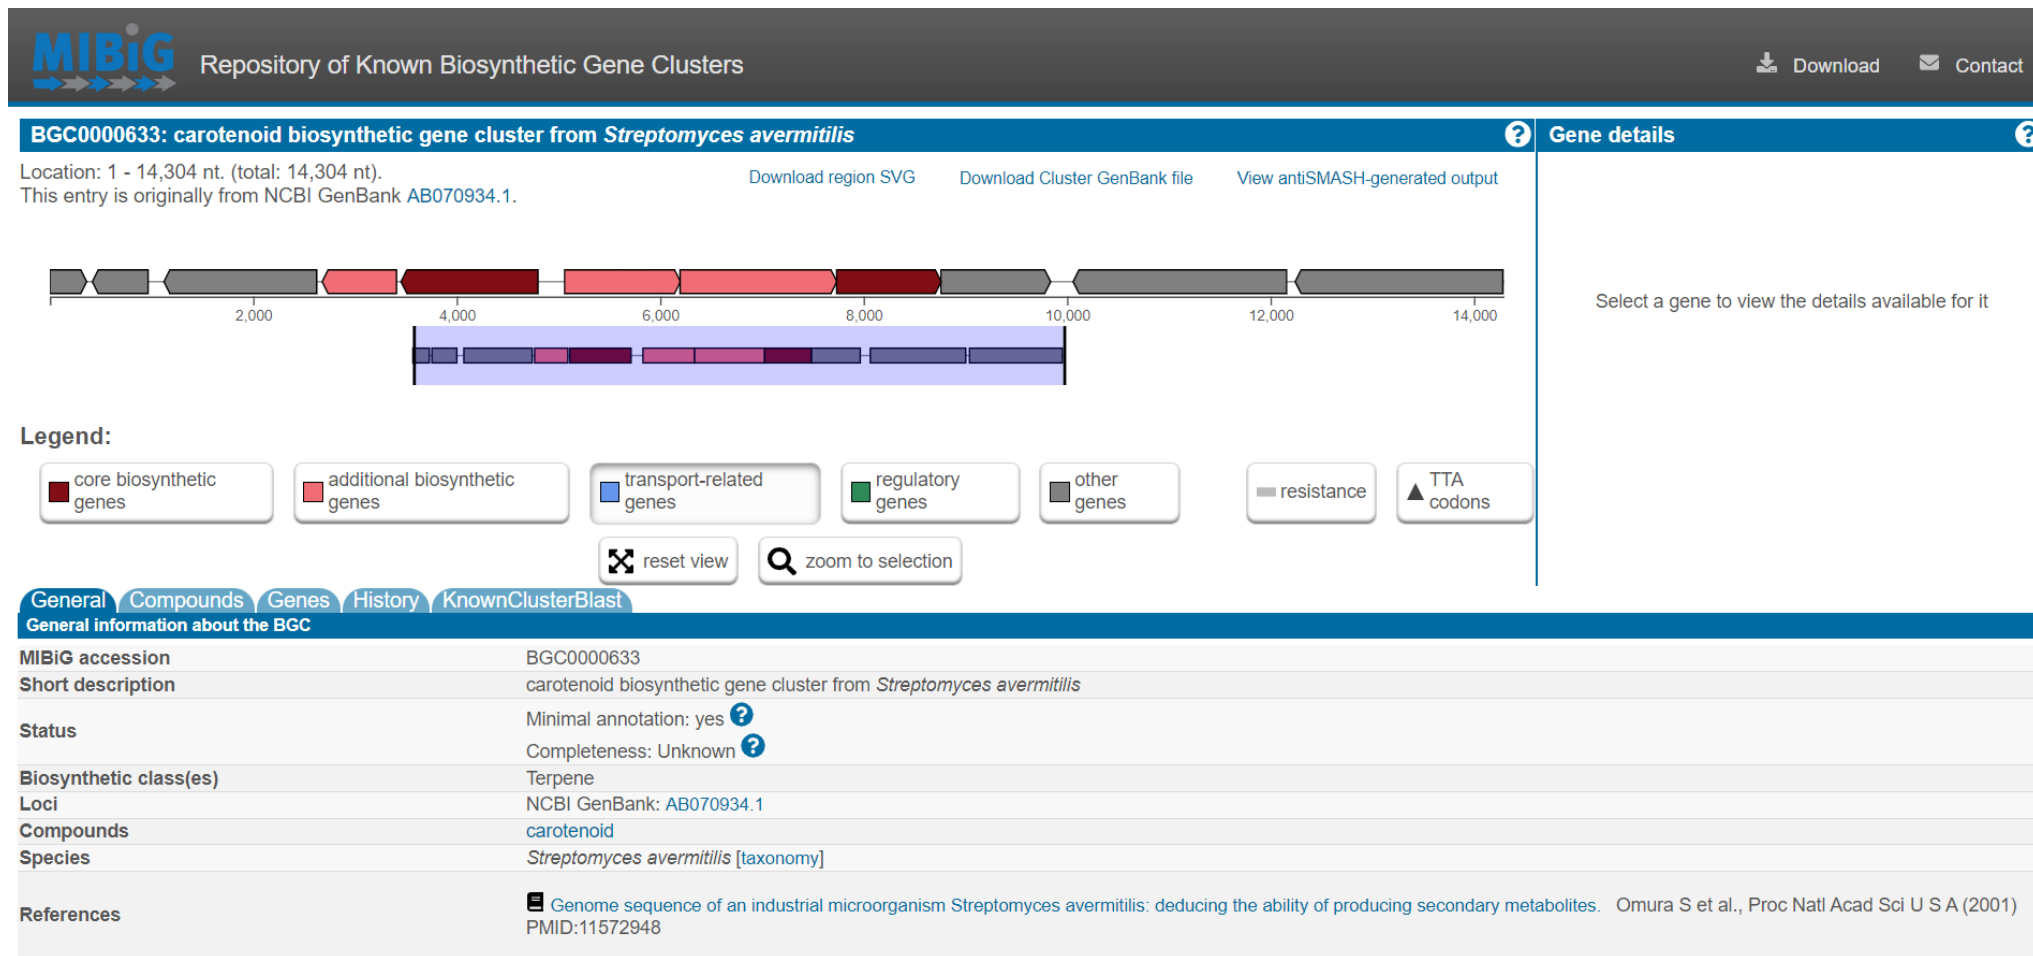

**Figure S4.** Identified biosynthetic gene cluster of *Streptomyces avermitilis* Terpene type carotenoid the Minimum Information about a Biosynthetic Gene cluster (MIBiG) database predicted for *R. erythropolis* MGMM8 on the antiSMASH 7.0.1 server.

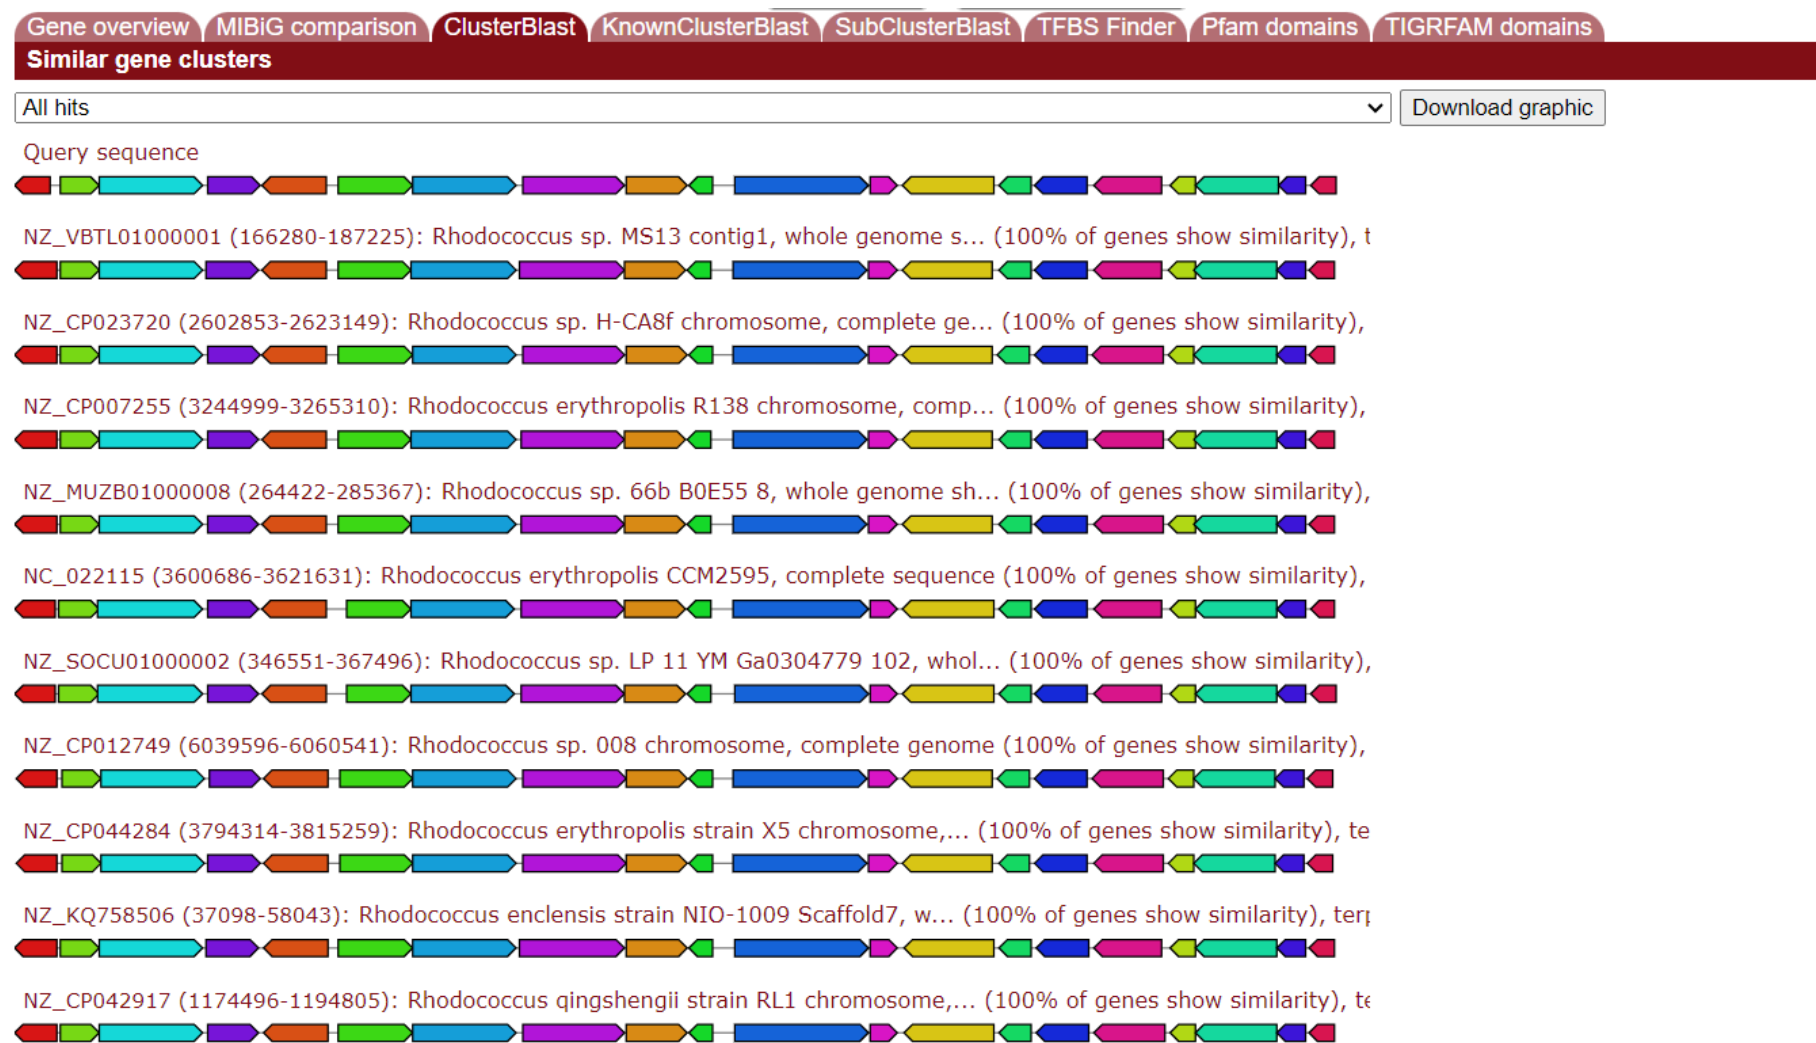

**Figure S5.** Percentage identity for the ClusterBlast feature for Terpene type carotenoid on antiSMAH 7.0.1 with 100% identity to strains of *Rhodococcus* spp.
